# Supplementary material
Source: publisher site journal article supplement (https://www.dovepress.com/get_supplementary_file.php?f=444885.docx)

**Very early pulsed dye lase intervention for optimal cosmetic outcome in post-thyroidectomy scars**

1Yul Hee Kim, 1Han Seul Kim, 2Hyeung Kyoo Kim, 2Soo Young Kim, 2Jeonghun Lee, 1You Chan Kim, 1Young Joon Park

1Department of Dermatology, Ajou University, School of Medicine, Suwon, Korea

2Department of Surgery, Ajou University School of Medicine, Suwon, Republic of Korea

Correspondence to: Young Joon Park, MD, PhD

Department of Dermatology, Ajou University Hospital, 164, World cup-ro, Yeongtong-gu, Suwon-si, Gyeonggi-do, Republic of Korea

Tel: +82-31-219-5187

Email: [aro@ajou.ac.kr](mailto:aro@ajou.ac.kr)

‘

**Table S1. Demographic and clinical characteristics comparing the extra-early treatment group**

|  |  |  |  |
| --- | --- | --- | --- |
| Characteristics | **Very early**  **treatment group** | **Early**  **treatment group** | *P* |
| Period from surgery to initial PDL treatment,  mean (SD), days | 14.9 (2.6) | 31.0 (5.5) |  |
| Case No. | 56 | 35 |  |
| Antera 3D camera measurement, N (%) | 33 (58.9) | 20 (65.7) |  |
| Sex, N (%) |  |  | 0.065 |
| Female | 48 (85.7) | 24 (68.6) |  |
| Male | 8 (14.3) | 11 (31.4) |  |
| Age, mean (SD), years old | 41.3 (9.3) | 41.5 (9.3) | 0.917 |
| Initial VSS, median (IQR) | 6.00 (3.00) | 5.00 (3.00) | 0.395 |
| End VSS, median (IQR) | 2.00 (3.00) | 2.00 (3.00) | 0.220 |

SD: standard deviation, IQR: Interquartile Range, VSS: Vancouver Scar Scale

**Table S2. Comparison of VSS and Antera scores according to triamcinolone intralesional injection**

|  |  |  |  |
| --- | --- | --- | --- |
| **Total VSS (Mean±SD)** | TAILI (+) (n=39) | TAILI (-) (n=52) | p-value |
| Initial | 6.23±1.83 | 5.16±1.67 | 0.0046 |
| End | 2.62±1.55 | 1.37±1.48 | 0.0002 |
| Percent change (%) | 59.30±22.04 | 75.11±26.80 | 0.0036 |
| TAILI (+) group | WTH3 (n=25) | BTW4-6 (n=14) | p-value |
| Initial | 6.52±1.85 | 5.71±1.73 | 0.1903 |
| End | 2.48±1.58 | 2.86±1.51 | 0.4733 |
| Percent change (%) | 64.26±22.54 | 50.43±18.69 | 0.0591 |
| TAILI (-) group | WTH3 (n=31) | BTW4-6 (n=21) | p-value |
| Initial | 5.16±1.73 | 5.15±1.60 | 0.9814 |
| End | 1.25±1.37 | 1.55±1.67 | 0.4979 |
| Percent change (%) | 78.58±22.18 | 69.73±32.61 | 0.2540 |
| **Antera (Mean±SD)** | TAILI (+) (n=39) | TAILI (-) (n=52) | p-value |
| Color variation | 4.68±0.87 | 4.10±0.71 | 0.0094 |
| Height | 0.07±0.01 | 0.06±0.01 | 0.0080 |
| Pigmentation | 0.61±1.28 | 0.64±0.07 | 0.1809 |
| Vascularity | 1.42±1.30.26 | 1.29±0.30 | 0.1184 |
| TAILI (+) group | WTH3 (n=25) | BTW4-6 (n=14) | p-value |
| Color variation | 4.69±1.00 | 4.66±0.70 | 0.9354 |
| Height | 0.07±0.01 | 0.07±0.01 | 0.9002 |
| Pigmentation | 0.58±0.16 | 0.64±0.06 | 0.3132 |
| Vascularity | 1.38±0.27 | 1.47±0.26 | 0.4110 |
| TAILI (-) group | WTH3 (n=31) | BTW4-6 (n=21) | p-value |
| Color variation | 4.22±0.62 | 3.93±0.80 | 0.2983 |
| Height | 0.06±0.01 | 0.06±0.01 | 0.8937 |
| Pigmentation | 0.64±0.08 | 0.65±0.05 | 0.6255 |
| Vascularity | 1.20±0.26 | 1.42±0.32 | 0.0642 |
| SD: Standard Deviation, TAILI: Triamcinolone intralesional injection WTH3: Initial treatment initiated within 3 weeks, BTW4-6: Between 4 to 6 weeks | | | |

**Fig. S1** Flowchart of patient selection


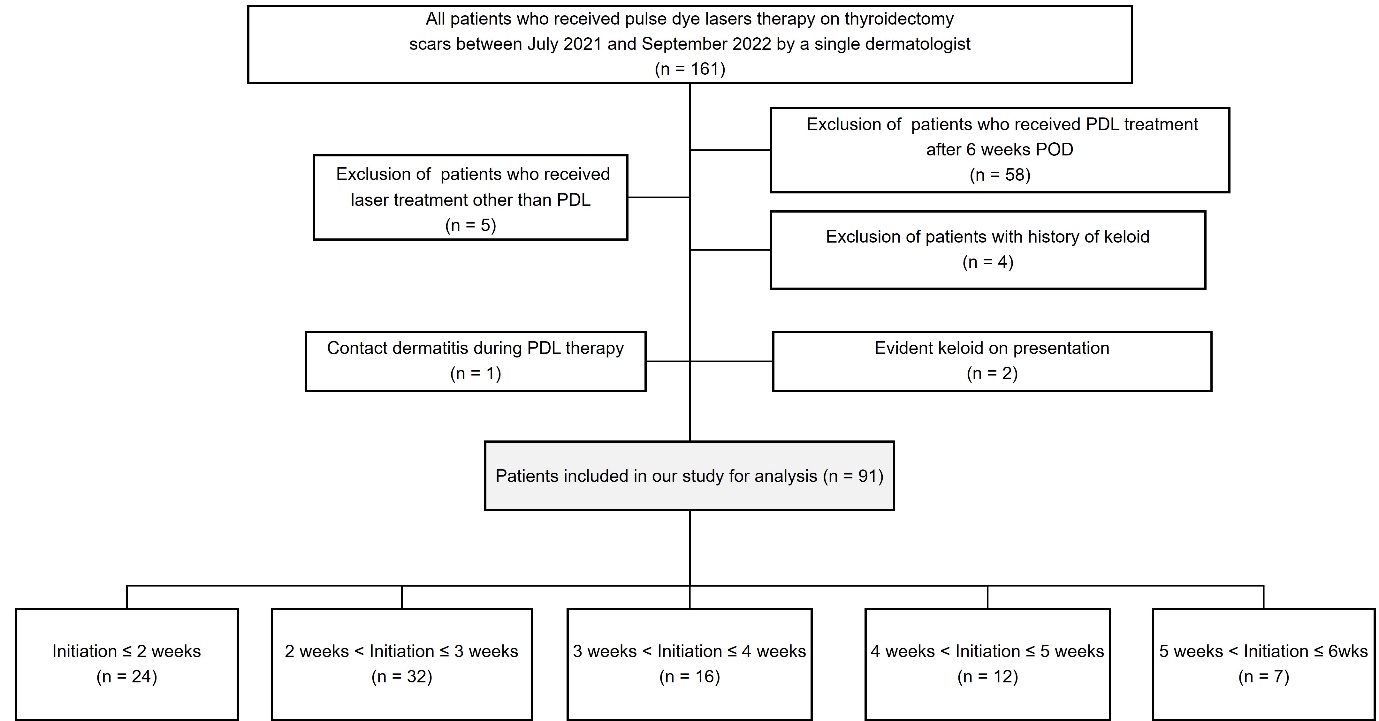


**Fig. S2** (A) VSS at the initiation of treatment by date. (B) VSS at the initiation of treatment grouped by initiation week of therapy.


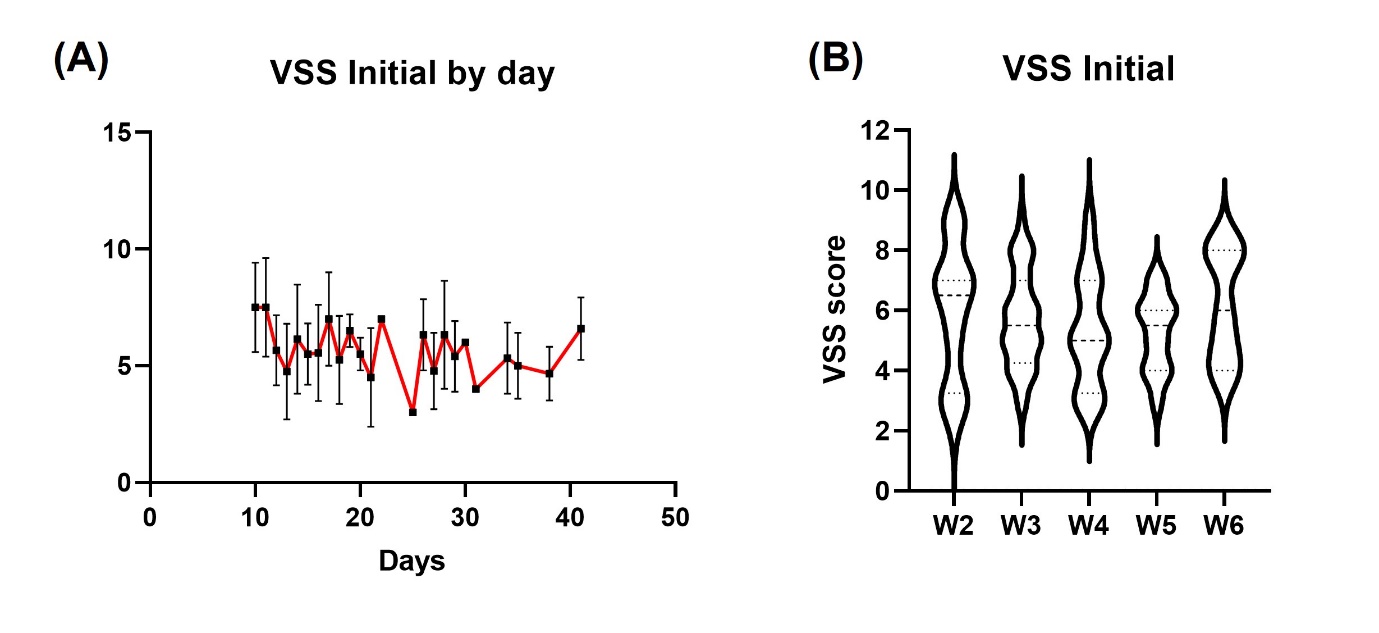


**Fig. S3** Comparison of scar-related values, variation level of hemoglobin, and melanin obtained using Antera 3D camera. WTH3 represents the very early treatment group, where PDL treatment was initiated within 3 weeks post-surgery, while BTW4-6 represents the early treatment group, in which the treatment began between weeks 4 and 6 post-surgery.


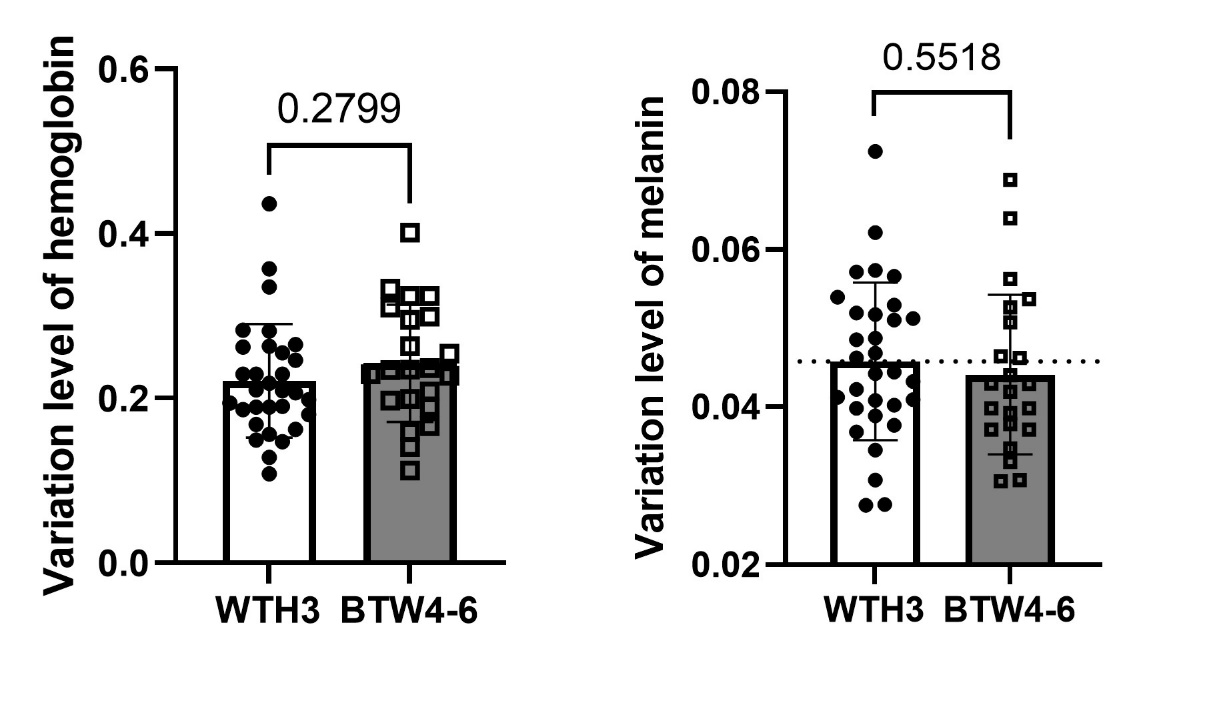

Supplement: Supplementary file 1 [file get_supplementary_file.php]
